# Supplementary material for: Protective Effects of Inhibition of Mitochondrial Fission on Organ Function After Sepsis
Source: PubMed Central journal article supplement (PMC8457550; doi:10.3389/fphar.2021.712489), 2021-09-08
Supplement: Image1.pdf [file Image1.pdf]

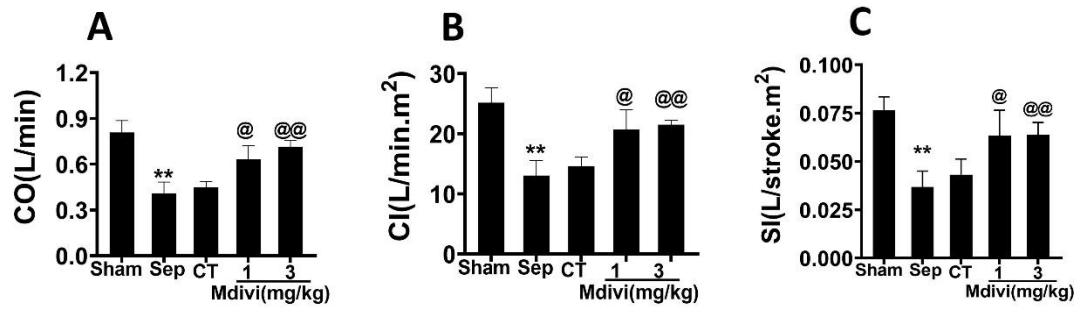

**SUPPLEMENTAL FIGURE 1.** Effects of Mdivi-1 on cardiac function in sepsis rats.

(A): CO (cardiac output), (B): CI (cardiac index). (C): SI (stroke index). \*\* $p < 0.01$  versus Sham. @ $p < 0.05$  and @@ $p < 0.01$  versus CT group. Sham=the control group, Sep=sepsis, CT=conventional treatment. 1: Mdivi-1 (1mg/kg). 3: Mdivi-1 (3mg/kg).
